# Supplementary material
Source: MDPI journal article supplement (https://www.mdpi.com/2072-4292/7/4/4233)
Supplement: s1 [file s1]

## Sheet: 50 m
	kNN_Age50	kNN_Height50	kNN_Volume50	kNN_Deciduous50	kNN_Pine50	kNN_Spruce50	ALS_ShanH50	ALS_95Height50	ALS_HighVeg50	ALS_LowVeg50	ALS_MaxH50	ALS_MaxHsd50
kNN_Age50	1	0.945114	0.884077	-0.645164	-0.333653	0.821922	-0.527099	0.887857	0.787241	-0.414889	0.860548	0.862695
kNN_Height50	0.945114	1	0.946515	-0.548795	-0.330806	0.795044	-0.606029	0.885081	0.91121	-0.337422	0.87281	0.856709
kNN_Volume50	0.884077	0.946515	1	-0.482906	-0.515075	0.884074	-0.481174	0.775274	0.854405	-0.30457	0.785093	0.750275
kNN_Deciduous50	-0.645164	-0.548794	-0.482906	1	0.0281484	-0.470309	0.484419	-0.615149	-0.405571	0.333972	-0.55487	-0.609827
kNN_Pine50	-0.333653	-0.330806	-0.515075	0.0281483	1	-0.784418	-0.0675935	-0.159684	-0.333103	-0.0776907	-0.23899	-0.142651
kNN_Spruce50	0.821922	0.795044	0.884074	-0.470309	-0.784418	1	-0.294202	0.654478	0.693703	-0.24861	0.685009	0.630038
ALS_ShanH50	-0.527099	-0.606029	-0.481173	0.484419	-0.0675935	-0.294202	1	-0.492099	-0.573519	-0.0337502	-0.391283	-0.477664
ALS_95Height50	0.887857	0.885081	0.775274	-0.615149	-0.159684	0.654478	-0.492099	1	0.80365	-0.54888	0.975311	0.991035
ALS_HighVeg50	0.787241	0.91121	0.854405	-0.405572	-0.333104	0.693703	-0.573519	0.80365	1	-0.105272	0.833635	0.76682
ALS_LowVeg50	-0.414889	-0.337422	-0.30457	0.333972	-0.0776907	-0.24861	-0.0337502	-0.54888	-0.105272	1	-0.515357	-0.569688
ALS_MaxH50	0.860548	0.87281	0.785093	-0.55487	-0.23899	0.685009	-0.391283	0.975311	0.833635	-0.515357	1	0.963616
ALS_MaxHsd50	0.862695	0.856709	0.750275	-0.609827	-0.142651	0.630038	-0.477664	0.991035	0.76682	-0.569688	0.963616	1
Description
	Correlation > 0.6
	Excluded variables
	Variables included in only one of the models
kNN_Volume50 strongly correlated with kNN_Age50, kNN_Height50, kNN_Spruce50, ALS_95Height50, ALS_HighVeg50, ALS_MaxH50, ALS_MaxHsd50: keep kNN_Volume50 and exclude the others since kNN_Volume50 is most accurately estimated
ALS_MaxH50 strongly correlated with kNN_Age50, kNN_Height50, kNN_Volume50, kNN_Spruce50, ALS_95Height50, ALS_HighVeg50, ALS_MaxHsd50: keep ALS_MaxH50 and exclude the others since ALS_MaxH50 is accurately estimated and has a clear physical relation to the forest height

## Sheet: 200 m
	kNN_Age200	kNN_Height200	kNN_Volume200	kNN_Deciduous200	kNN_Pine200	kNN_Spruce200	ALS_ShanH200	ALS_95Height200	ALS_HighVeg200	ALS_LowVeg200	ALS_MaxH200	ALS_MaxHsd200
kNN_Age200	1	0.382574	0.901315	-0.609117	-0.303072	0.821331	-0.546069	0.886031	0.760018	-0.43259	0.89124	0.832046
kNN_Height200	0.382574	1	0.248669	-0.452714	0.161415	0.0271368	-0.264863	0.303153	0.167934	-0.316849	0.246076	0.356726
kNN_Volume200	0.901315	0.248669	1	-0.435079	-0.531549	0.916752	-0.509411	0.785851	0.877814	-0.265089	0.843237	0.693317
kNN_Deciduous200	-0.609117	-0.452714	-0.435078	1	-0.0934891	-0.382489	0.483555	-0.563176	-0.292553	0.366502	-0.500275	-0.579114
kNN_Pine200	-0.303072	0.161415	-0.531549	-0.0934891	1	-0.742308	-0.161613	-0.152446	-0.38614	-0.109765	-0.280683	-0.040307
kNN_Spruce200	0.821331	0.0271368	0.916752	-0.382489	-0.742308	1	-0.308444	0.677349	0.736841	-0.200497	0.754176	0.568877
ALS_ShanH200	-0.546069	-0.264863	-0.509411	0.483555	-0.161613	-0.308444	1	-0.564087	-0.654679	0.0251816	-0.526476	-0.519141
ALS_95Height200	0.886031	0.303153	0.785851	-0.563176	-0.152446	0.677349	-0.564087	1	0.759843	-0.589788	0.978186	0.973969
ALS_HighVeg200	0.760018	0.167934	0.877814	-0.292553	-0.38614	0.736841	-0.654679	0.759843	1	-0.0676413	0.832256	0.668262
ALS_LowVeg200	-0.43259	-0.316849	-0.265089	0.366502	-0.109765	-0.200497	0.0251816	-0.589788	-0.0676413	1	-0.493148	-0.619186
ALS_MaxH200	0.89124	0.246076	0.843237	-0.500275	-0.280683	0.754176	-0.526476	0.978186	0.832256	-0.493148	1	0.932988
ALS_MaxHsd200	0.832046	0.356726	0.693317	-0.579114	-0.040307	0.568877	-0.519141	0.973969	0.668262	-0.619186	0.932988	1
Description
	Correlation > 0.6
	Excluded variables
	Variables included in only one of the models
kNN_Volume200 strongly correlated with kNN_Age200, kNN_Spruce200, ALS_95Height200, ALS_HighVeg200, ALS_MaxH200, ALS_MaxHsd200: keep kNN_Volume200 and exclude the others since kNN_Volume200 is most accurately estimated
ALS_MaxH200 strongly correlated with kNN_Age200, kNN_Volume200, kNN_Spruce200, ALS_95Height200, ALS_HighVeg200, ALS_MaxHsd200: : keep ALS_MaxH200 and exclude the others since ALS_MaxH200 is accurately estimated and has a clear physical relation to the forest height
